# Supplementary material
Source: PubMed Central journal article supplement (PMC1945062)
Supplement: pbio.0050201.sg001.pdf [file pbio.0050201.sg001.pdf]

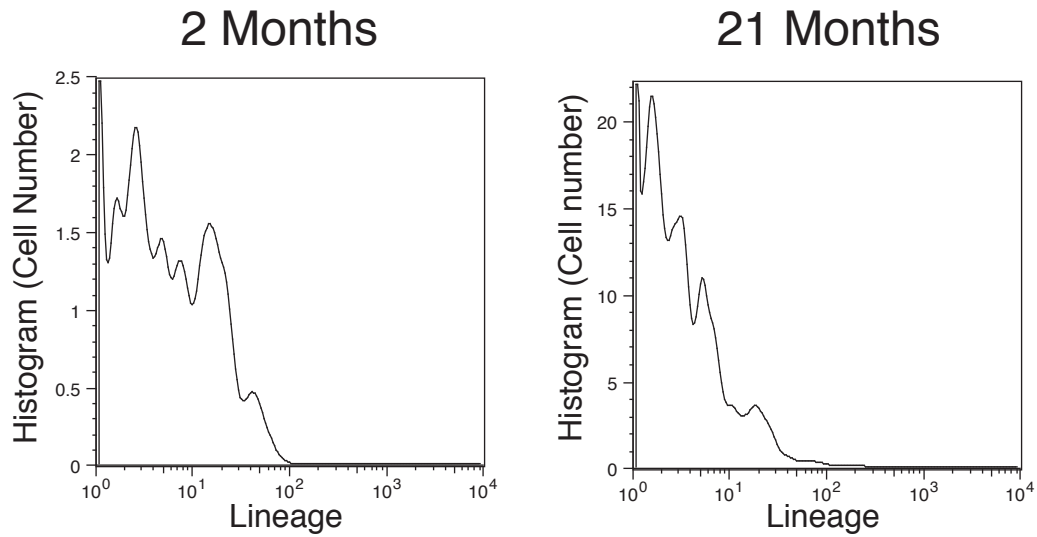

Supplemental Figure S1 - FACS analysis of SP cell lineage expression. Young (2 Mo) and Old (21 Mo) SP cells express very low levels of differentiated cell surface lineage markers (Gr-1, Mac-1, B220, Ter119, CD4, and CD8).
