# Supplementary material
Source: PubMed Central journal article supplement (PMC1945062)
Supplement: pbio.0050201.sg002.pdf [file pbio.0050201.sg002.pdf]

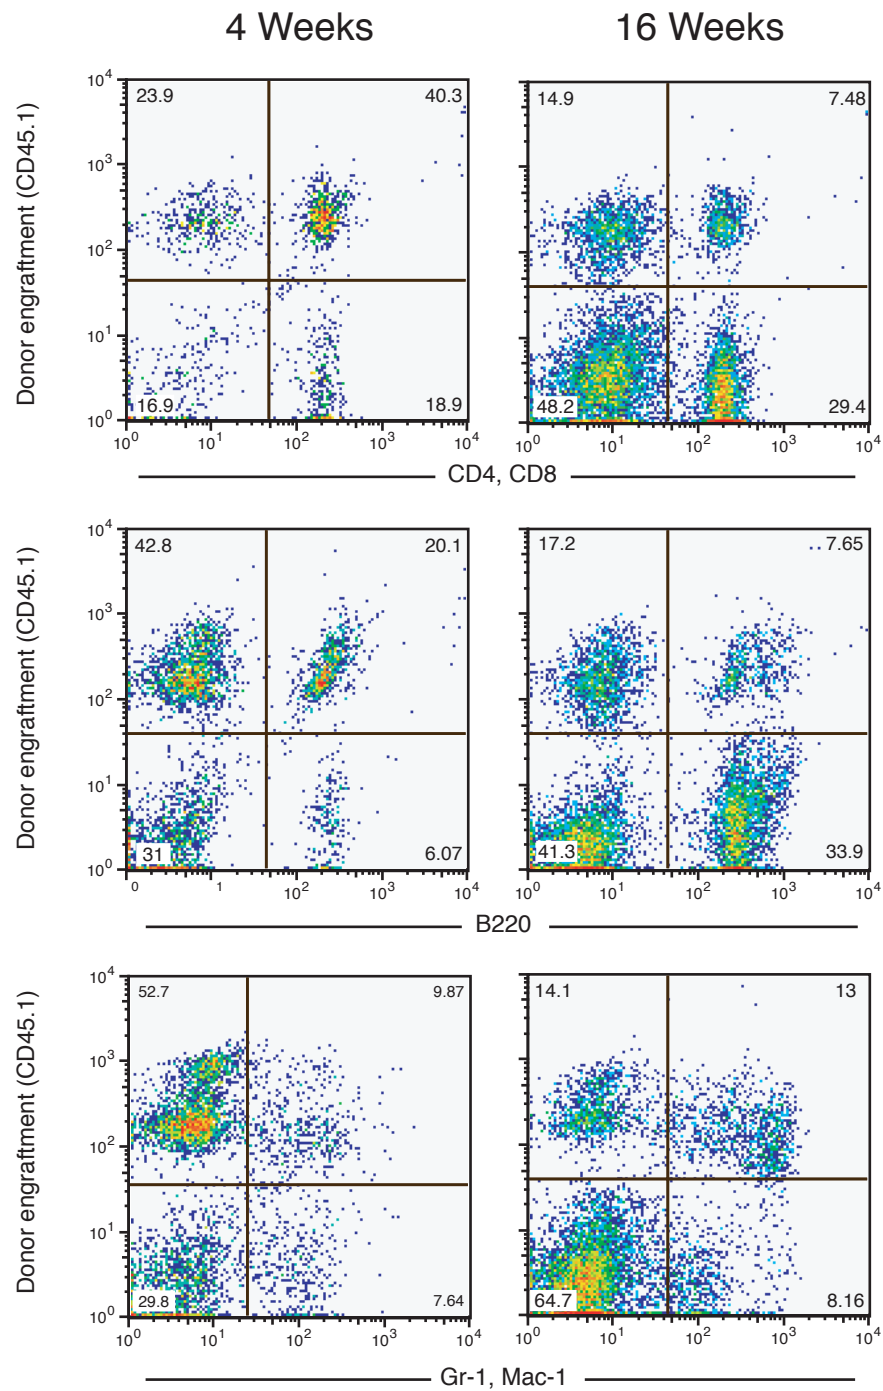

Supplemental Figure S2 - FACS analysis of peripheral blood contribution of HSC from 21-month-old mice after transplant. HSC from old mice reconstitute all three lineages of the peripheral blood including myeloid (Gr-1, Mac-1), B-cell (B220), and T-cell (CD4,8) at both 4 and 16 weeks post transplant.
