# Supplementary material
Source: PubMed Central journal article supplement (PMC1945062)
Supplement: pbio.0050201.sg003.pdf [file pbio.0050201.sg003.pdf]

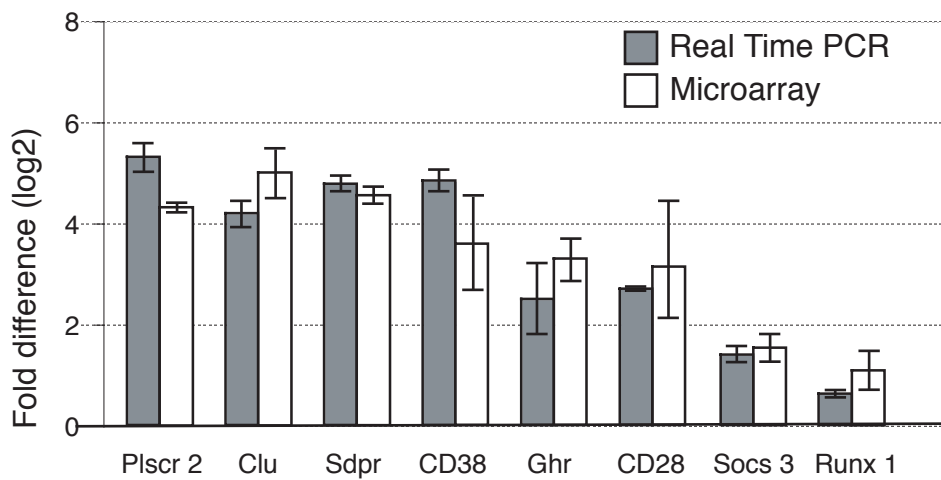

Supplemental Figure S3 - Real Time PCR of selected upregulated HSC aging genes. Error bars represent standard error from two separate experiments. mRNA was purified from HSC sorted independently from the HSC used in the microarray studies.
