# Supplementary material
Source: PubMed Central journal article supplement (PMC1945062)
Supplement: pbio.0050201.sg005.pdf [file pbio.0050201.sg005.pdf]

Chambers et al. Figure S5

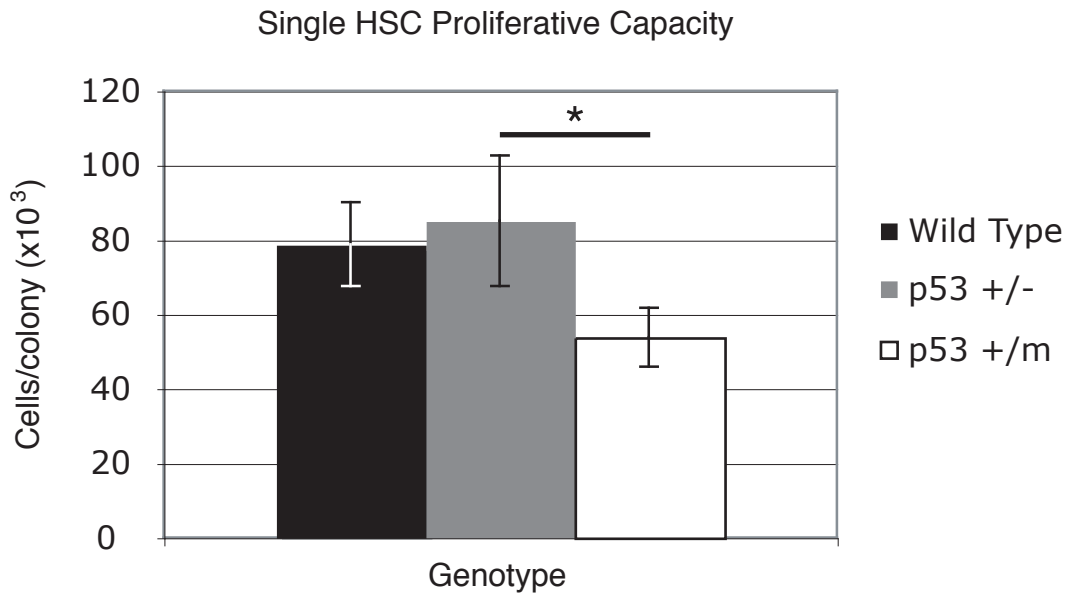

Percent of HSC forming colonies

|           | Plate 1 | Plate 2 |
|-----------|---------|---------|
| Wild Type | 76      | 69      |
| p53 +/-   | 84      | 84      |
| p53 +/m   | 83      | 79      |

Supplemental Figure 5 - Single HSC from wild type, p53 +/-, and p53 +/m 12-month-old mice were sorted into 96-well plates containing methylcellulose (Stem Cell Technologies, M3434) and allowed to form colonies for 14 days. p53 +/m HSC were found to give rise to significantly smaller colonies (\*p-value  $\leq$  .004) when 10 Colonies were pooled and the average number of cells per colony was determined for 60 colonies (n=6) for each genotype. All three genotypes formed colonies at approximately the same frequency as shown in the table based on the percent of wells containing a colony (96-well plate).
